# Supplementary material for: A Deep-Learning-Based Method Can Detect Both Common and Rare Genetic Disorders in Fetal Ultrasound
Source: MDPI journal article supplement (doi:10.3390/biomedicines11061756), 2023-06-19
Supplement: s1 [file s1]

## Supplementary Information

---

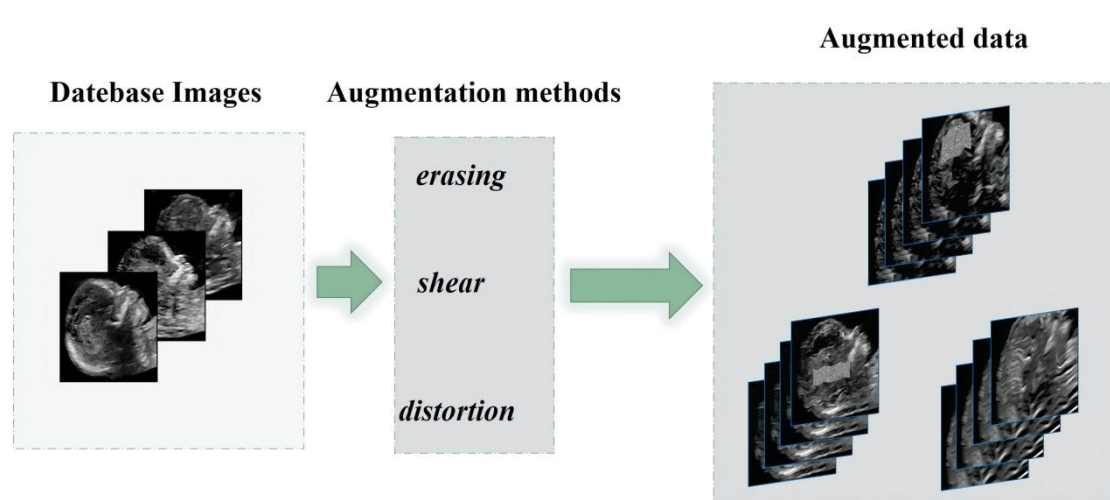

**Figure S1.** Augmentation Methods: We used distortion, zoom in, tilt, zoom out, crop, and a combination of multiple methods to augment the training date set.

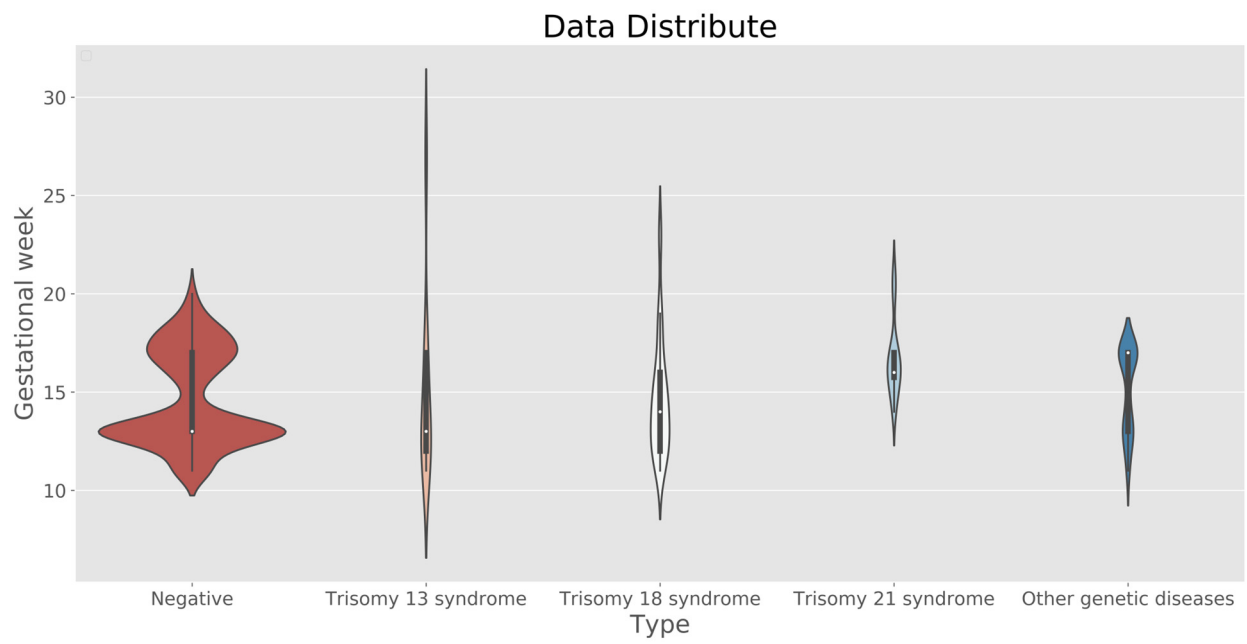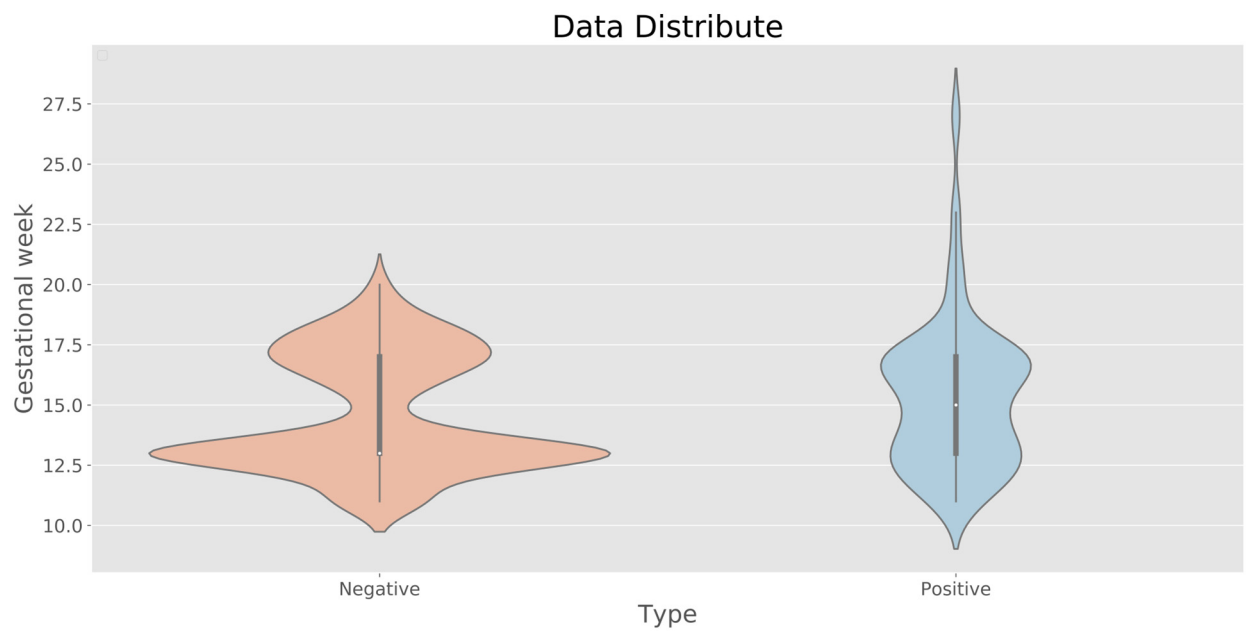

**Figure S2.** Violin Plot: Gestational age distribution of each group, including negative, positive, Trisomy 21, Trisomy 18, Trisomy 13 and other genetic disease groups.

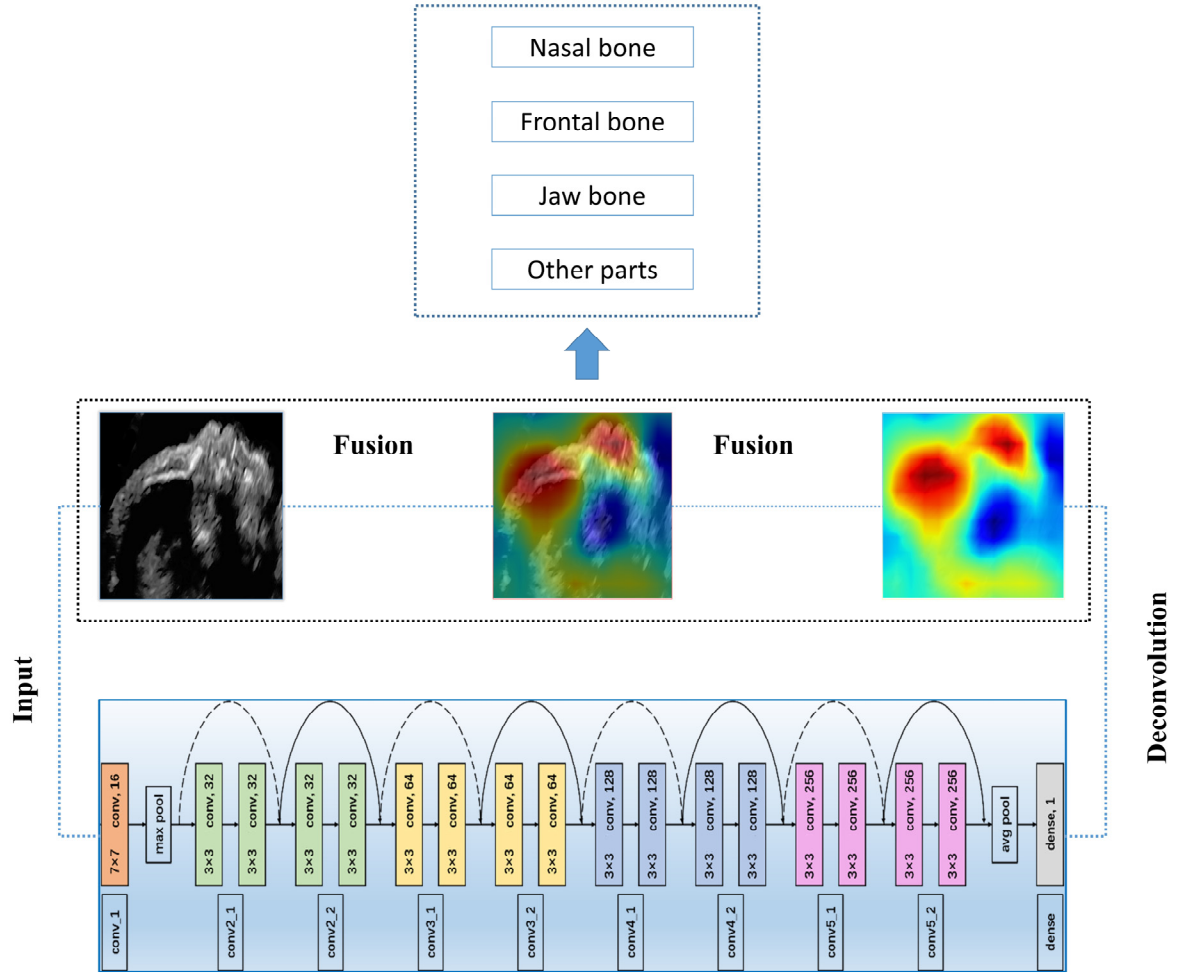

**Figure S3.** Model structure frame: Model parameters of Pgds-ResNet's and the framework of the interpretable experiment.

A

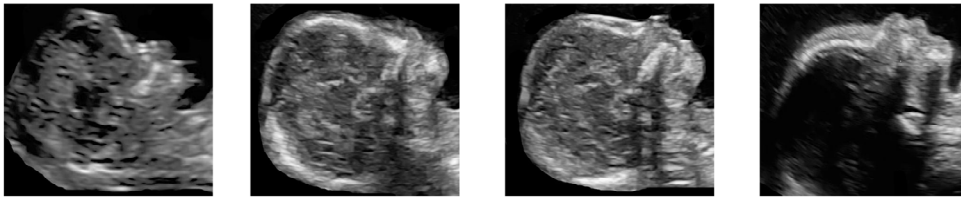

B

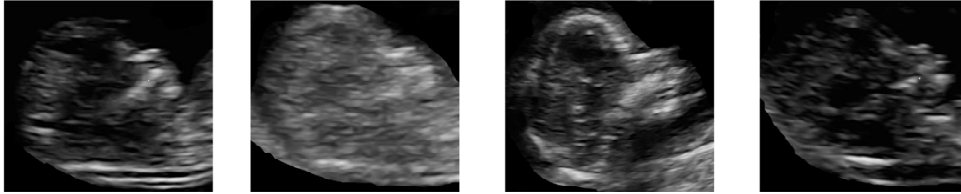

**Figure S4.** Image quality comparison. A. Good quality. B. Poor quality.

A

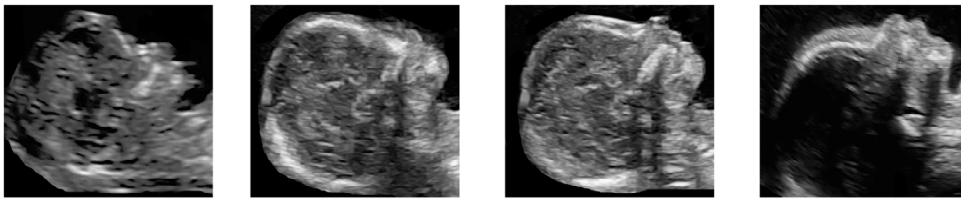

B

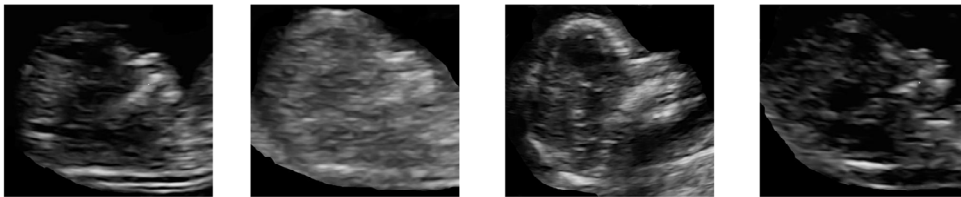

**Figure S5.** Image quality comparison. A. Good quality. B. Poor quality. In this study, image quality was identified as the main cause of incorrect classification results. The images in B had poor quality, which led to misclassification by the model.
